# Supplementary material for: A novel one-step synthesis of Ce/Mn/Fe mixed metal oxide nanocomposites for oxidative removal of hydrogen sulfide at room temperature
Source: Royal Society of Chemistry journal article supplement (doi:10.1039/d1ra03309c), 2021-01-01
Supplement: d1ra03309c1.pdf [file d1ra03309c1.pdf]

**A novel one-step synthesis of Ce/Mn/Fe mixed metal oxide nanocomposites for oxidative  
removal of hydrogen sulfide at room temperature**

Nishesh Kumar Gupta<sup>a,b</sup>, Jiyeol Bae<sup>a,b\*</sup>, Kwang Soo Kim<sup>a,b</sup>

*a. University of Science and Technology (UST), Daejeon, Republic of Korea*

*b. Department of Land, Water, and Environment Research, Korea Institute of Civil  
Engineering and Building Technology (KICT), Goyang, Republic of Korea*

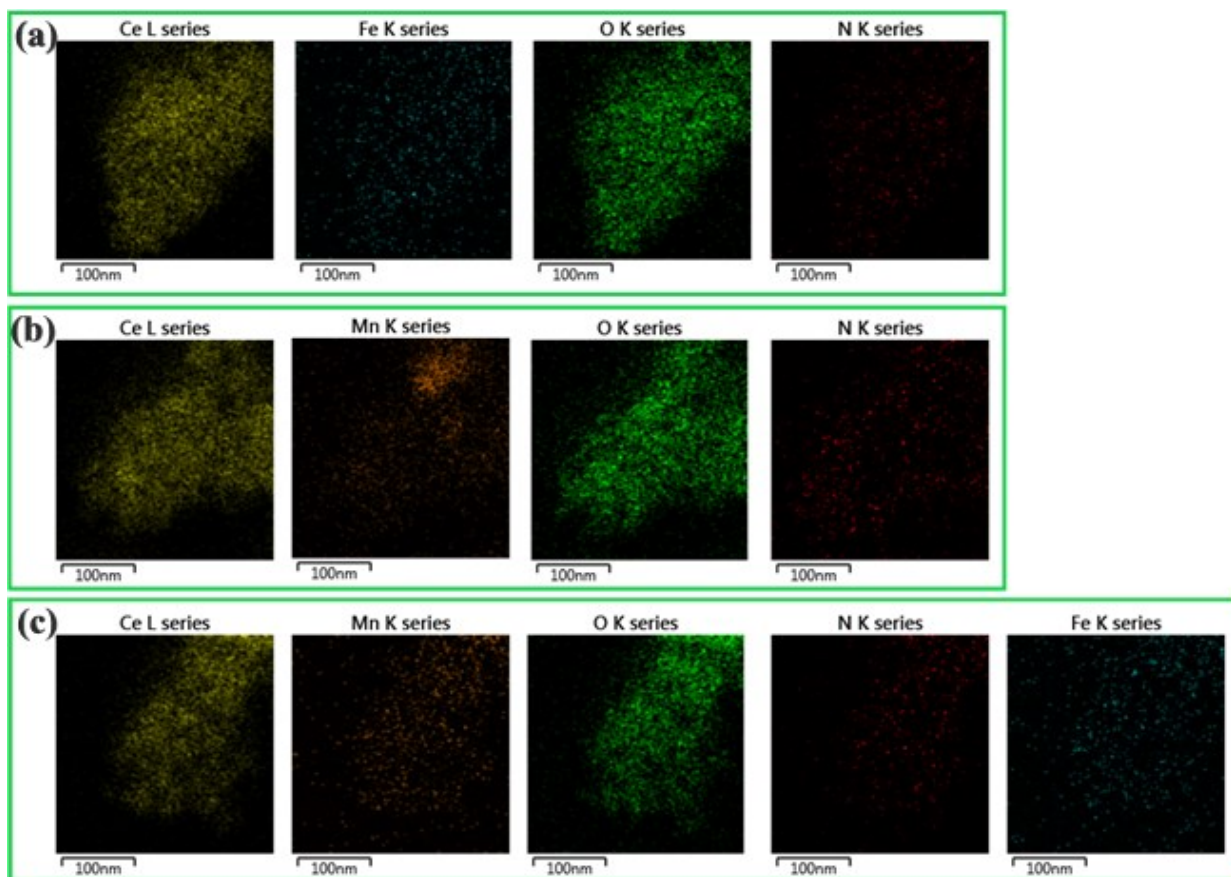

**Fig. S1.** EDAX elemental mapping of (a) CeFe; (b) CeMn; (c) CeMnFe.

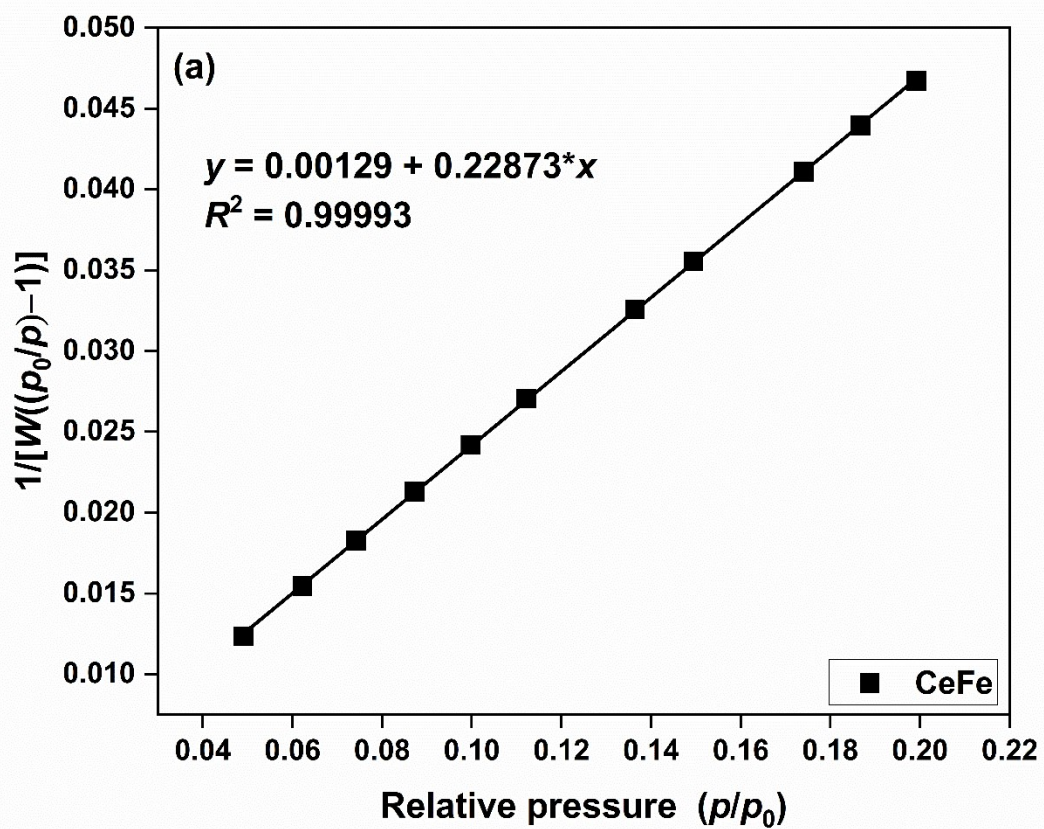

Fig. S2. BET plot of CeFe.

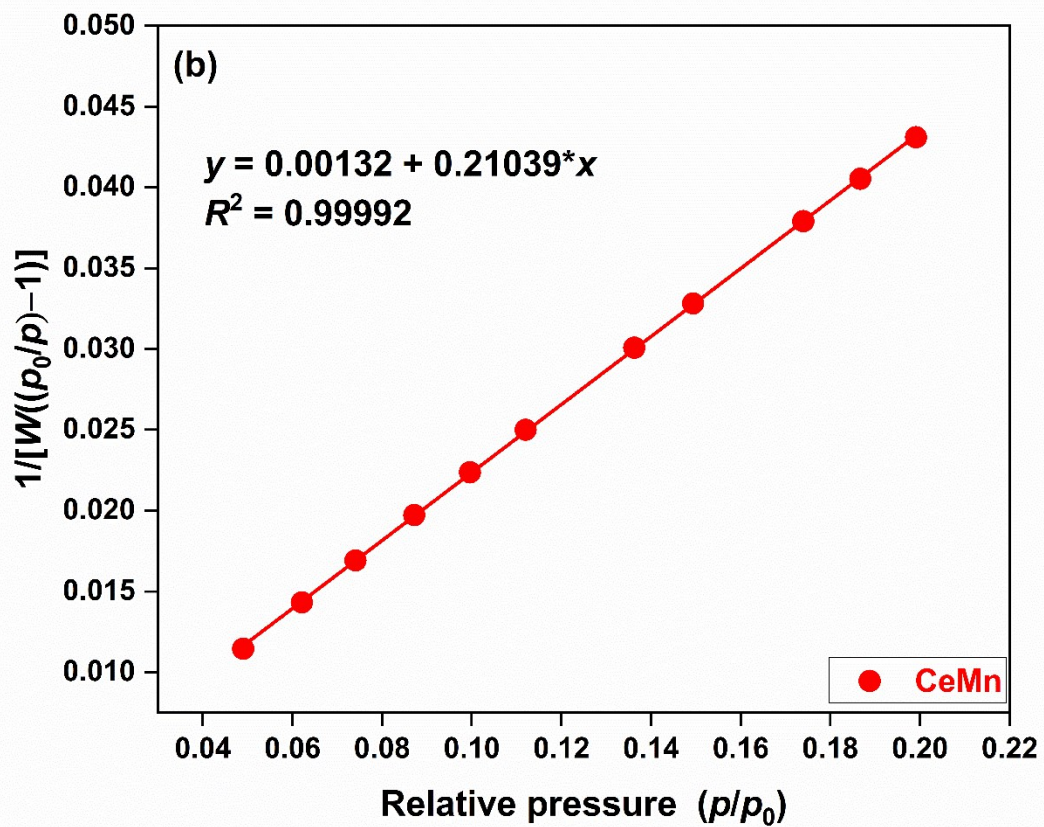

Fig. S3. BET plot of CeMn.

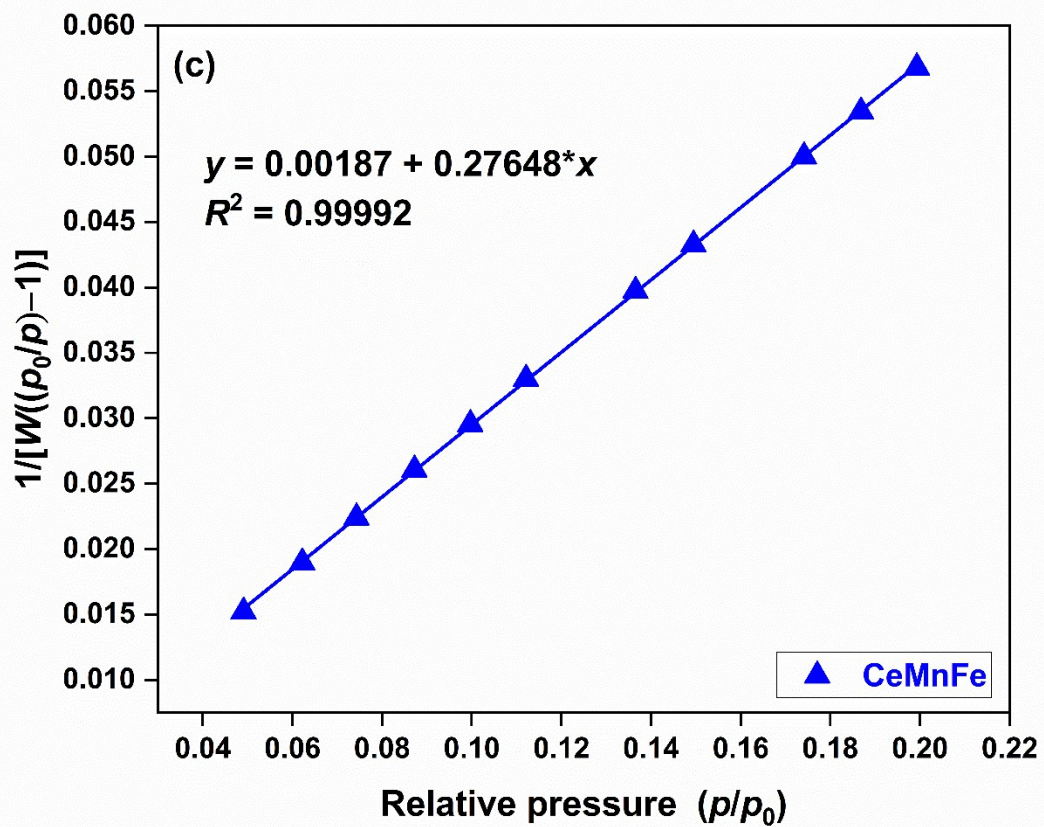

Fig. S4. BET plot of CeMnFe.



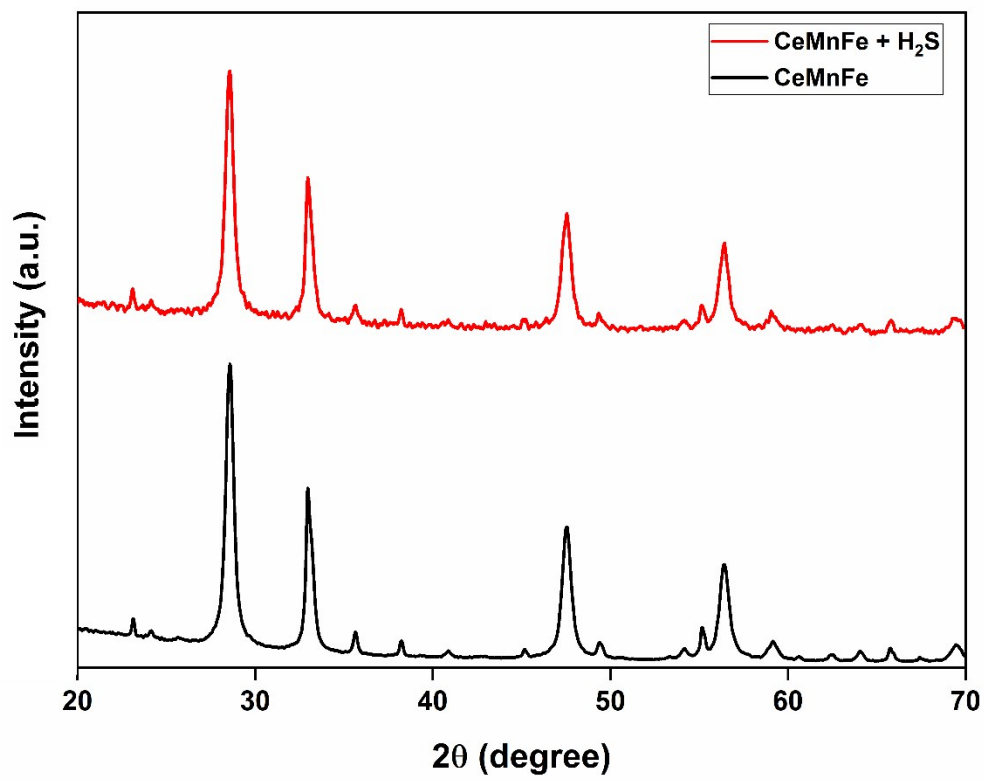

Fig. S5. PXRD pattern of CeMnFe before and after H<sub>2</sub>S adsorption.

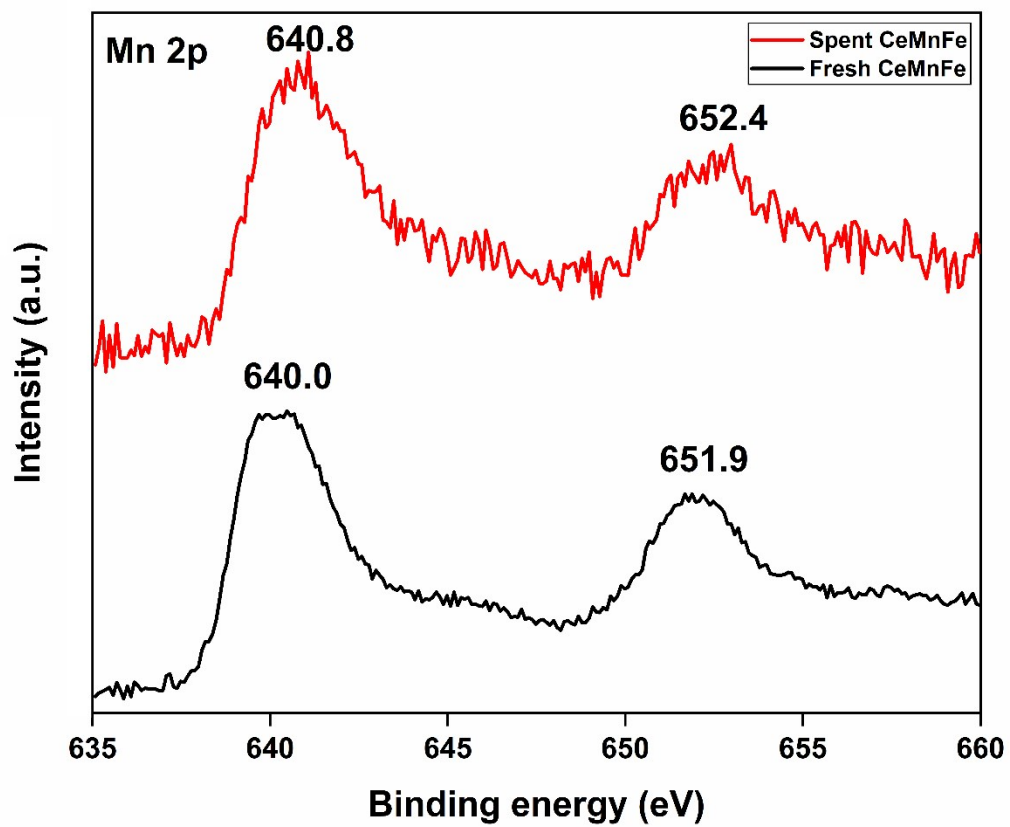

Fig. S6. HRXPS Mn 2p spectra of fresh and spent CeMnFe.

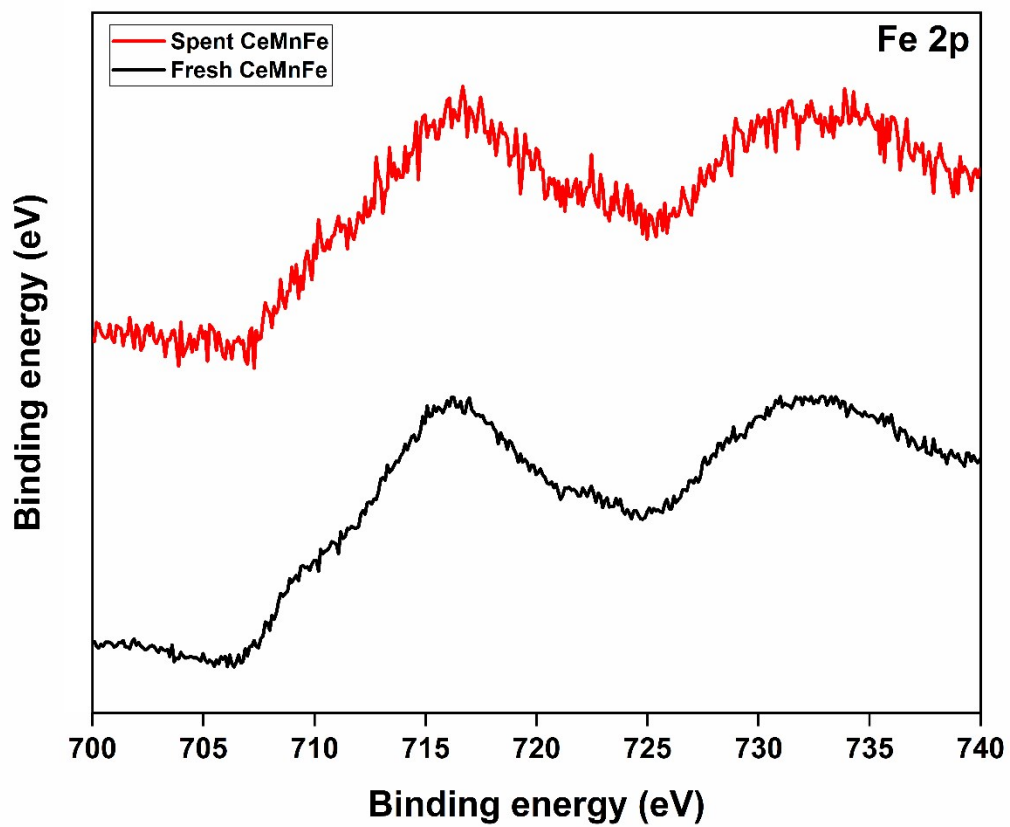

Fig. S7. HRXPS Fe 2p spectra of fresh and spent CeMnFe.

**Table S1.** The peak-fitting results of O 1s high-resolution signals of mixed metal oxides.

| Samples         | Assignment                  | E <sub>B</sub> (eV) | FWHM (eV) | At. % |
|-----------------|-----------------------------|---------------------|-----------|-------|
| CeFe            | <b>O1s</b> O–Ce, O–Fe       | 530.0               | 1.2       | 76.2  |
|                 | <b>O1s</b> O–H              | 532.3               | 1.7       | 19.1  |
|                 | <b>O1s</b> water            | 534.0               | 1.8       | 4.7   |
| CeMn            | <b>O1s</b> O–Ce, O–Mn       | 530.0               | 1.2       | 79.5  |
|                 | <b>O1s</b> O–H              | 532.1               | 1.8       | 17.1  |
|                 | <b>O1s</b> water            | 533.7               | 1.9       | 3.4   |
| Fresh<br>CeMnFe | <b>O1s</b> O–Ce, O–Mn, O–Fe | 530.0               | 1.2       | 77.4  |
|                 | <b>O1s</b> O–H              | 532.3               | 1.8       | 19.5  |
|                 | <b>O1s</b> water            | 534.1               | 1.9       | 3.1   |
| Spent<br>CeMnFe | <b>O1s</b> O–Ce, O–Mn, O–Fe | 530.0               | 1.4       | 59.9  |
|                 | <b>O1s</b> O–H              | 531.6               | 1.8       | 28.8  |
|                 | <b>O1s</b> water            | 533.3               | 1.9       | 11.3  |

**Table S2.** The peak-fitting results of Ce 3d high-resolution signals of mixed metal oxides.

| Samples | Assignment                                 | E <sub>B</sub> (eV) | FWHM (eV) | At. % |
|---------|--------------------------------------------|---------------------|-----------|-------|
| CeFe    | <b>Ce3d<sub>5/2</sub></b> Ce <sup>3+</sup> | 880.2               | 1.9       | 9.8   |
|         | <b>Ce3d<sub>5/2</sub></b> Ce <sup>3+</sup> | 885.5               | 3.0       | 18.3  |
|         | <b>Ce3d<sub>5/2</sub></b> Ce <sup>4+</sup> | 881.9               | 1.5       | 27.3  |
|         | <b>Ce3d<sub>5/2</sub></b> Ce <sup>4+</sup> | 883.4               | 2.8       | 23.0  |
|         | <b>Ce3d<sub>5/2</sub></b> Ce <sup>4+</sup> | 888.7               | 3.2       | 21.5  |



|                     |                                            |       |     |      |
|---------------------|--------------------------------------------|-------|-----|------|
| <b>CeMn</b>         | <b>Ce3d<sub>5/2</sub></b> Ce <sup>3+</sup> | 880.2 | 1.9 | 6.8  |
|                     | <b>Ce3d<sub>5/2</sub></b> Ce <sup>3+</sup> | 885.1 | 3.2 | 17.3 |
|                     | <b>Ce3d<sub>5/2</sub></b> Ce <sup>4+</sup> | 881.8 | 1.5 | 25.2 |
|                     | <b>Ce3d<sub>5/2</sub></b> Ce <sup>4+</sup> | 882.9 | 2.6 | 23.3 |
|                     | <b>Ce3d<sub>5/2</sub></b> Ce <sup>4+</sup> | 888.5 | 3.5 | 27.3 |
| <b>Fresh CeMnFe</b> | <b>Ce3d<sub>5/2</sub></b> Ce <sup>3+</sup> | 880.3 | 1.9 | 7.7  |
|                     | <b>Ce3d<sub>5/2</sub></b> Ce <sup>3+</sup> | 885.1 | 3.2 | 17.8 |
|                     | <b>Ce3d<sub>5/2</sub></b> Ce <sup>4+</sup> | 881.8 | 1.5 | 25.7 |
|                     | <b>Ce3d<sub>5/2</sub></b> Ce <sup>4+</sup> | 883.0 | 2.8 | 23.0 |
|                     | <b>Ce3d<sub>5/2</sub></b> Ce <sup>4+</sup> | 888.5 | 3.5 | 25.9 |
| <b>Spent CeMnFe</b> | <b>Ce3d<sub>5/2</sub></b> Ce <sup>3+</sup> | 880.3 | 1.9 | 2.9  |
|                     | <b>Ce3d<sub>5/2</sub></b> Ce <sup>3+</sup> | 886.5 | 3.0 | 10.2 |
|                     | <b>Ce3d<sub>5/2</sub></b> Ce <sup>4+</sup> | 882.4 | 1.8 | 28.7 |
|                     | <b>Ce3d<sub>5/2</sub></b> Ce <sup>4+</sup> | 883.9 | 2.8 | 28.5 |
|                     | <b>Ce3d<sub>5/2</sub></b> Ce <sup>4+</sup> | 889.4 | 3.5 | 29.7 |
